# Supplementary material
Source: PubMed Central journal article supplement (PMC8370013)
Supplement: jama-322-2411-s001.pdf [file jama-322-2411-s001.pdf]

1  
2  
3  
4  
5  
6  
7  
8  
9  
10  
11  
12  
13  
14  
15  
16  
17  
18  
19  
20

**Statistical Analysis Plan:**  
**Association of Premature Natural and Surgical Menopause with Incident**  
**Cardiovascular Risk Factors and Cardiovascular Disease**

Michael C. Honigberg, MD, MPP

Pradeep Natarajan, MD MMSc

First Draft: July 16, 2019

Final Version: August 16, 2019

E-mail Address: [mhonigberg@bwh.harvard.edu](mailto:mhonigberg@bwh.harvard.edu)

21 **I. Specific aims**

22 1. To examine the association of premature menopause, defined as menopause prior  
23 to age 40 (per recent guidelines), with incidence of diverse cardiovascular  
24 diseases, and to compare the risks associated with premature natural vs. surgical  
25 menopause.

26 a. **Hypothesis:** Menopause prior to age 40 is associated with hazard of diverse  
27 cardiovascular conditions, after adjustment for conventional cardiovascular  
28 risk factors.

29 b. **Hypothesis:** Premature surgical menopause is associated with greater  
30 cardiovascular risk than premature natural menopause.

31 2. To examine the association of premature menopause with the development of  
32 cardiovascular risk factors (hypertension, hyperlipidemia, and type 2 diabetes).

33 a. **Hypothesis:** Premature menopause is associated with accelerated  
34 development of these conventional cardiovascular risk factors.

35 3. To examine the association of alternate menopausal age thresholds with the  
36 development of cardiovascular risk factors and cardiovascular disease.

37 a. **Hypothesis:** Progressively lower age at menopause is associated with  
38 progressive increase in cardiovascular risk.

39

40 **II. Research strategy**

41 **a. Significance:**

42 Although cardiovascular disease is the leading cause of death among women in  
43 the U.S. and worldwide,<sup>1</sup> sex-specific risk factors for cardiovascular disease in women

44 remain under-recognized and incompletely understood.<sup>2</sup> Most women in North America  
45 experience menopause between age 40 and 58, with a mean age at menopause of 51  
46 years.<sup>3,4</sup> Up to 10% of women undergo menopause before age 45,<sup>5</sup> and 1% experience  
47 menopause before age 40 (frequently labeled primary ovarian insufficiency when  
48 occurring spontaneously).<sup>3,6-8</sup> Although “premature menopause” has been variably  
49 defined in the literature with typical cutoffs ranging from 45-48 years, earlier age at  
50 menopause and shorter duration of reproductive lifespan (i.e., time from menarche to  
51 menopause) have been associated with increased risk of coronary artery disease and, less  
52 consistently, with increased risk of stroke.<sup>9-15</sup> Additionally, a study examining a subset of  
53 the Women’s Health Initiative cohort found a modest association between reproductive  
54 duration and risk of incident heart failure.<sup>16</sup>

55         Based on these data and others,<sup>9,12</sup> recent updates to the ACC/AHA cholesterol<sup>17</sup>  
56 and primary prevention<sup>18</sup> guidelines endorse using a history of premature menopause,  
57 defined in the guidelines as menopause prior to age 40, to refine cardiovascular risk  
58 assessments and guide prescription of statin medications for asymptomatic, middle-aged  
59 women with intermediate risk of atherosclerotic cardiovascular disease (ASCVD).  
60 However, robust data are limited on the development of cardiovascular risk factors  
61 among women with menopause before age 40 and the long-term risk of both ASCVD and  
62 non-ASCVD cardiovascular diseases in this population. To date, one meta-analysis  
63 including 10 studies with 190,000 women assessed the risk of ASCVD associated with  
64 natural menopause prior to age 40 and found modestly elevated hazard of coronary artery  
65 disease but not of stroke.<sup>12</sup> Further, data are inconsistent on whether cardiovascular

66 disease risk differs between women with premature natural and surgical menopause,<sup>19</sup>  
67 though recent large studies have not shown a difference in risk.<sup>9,10</sup>

68

69 **b. Innovation:** The UK Biobank, a very large (~500,000 adult residents of the United  
70 Kingdom), prospective, observational cohort study, provides the largest cohort of  
71 postmenopausal women amassed to date with detailed data on reproductive history.

72 Because the cohort is well phenotyped at baseline, we are able to capture and adjust for  
73 comprehensive prevalent comorbidities/risk factors, vital signs and body mass index,  
74 medication use (including detailed ascertainment of prior use of hormone replacement  
75 therapy [HRT]), and laboratory biomarkers. Further, we are able to examine incident  
76 hypertension, hyperlipidemia, and type 2 diabetes mellitus (T2DM), which to date have  
77 not been robustly studied in relation to premature menopause, and a greater diversity of  
78 cardiovascular outcomes than have been previously studied, spanning ASCVD, heart  
79 failure, valvular heart disease, atrial fibrillation, and venous thromboembolism.

80

81 **c. Approach:**

82 *i. Study design:* The UK Biobank is a prospective, observational, population-based  
83 cohort study, with median 7 (range 0-10.6) year follow-up.

84 *ii. Study population:* As summarized in the figure below, women aged 40-69 years at  
85 study enrollment will be considered for inclusion. Women will be excluded from the  
86 study sample if they are pre-menopausal, have unknown menopausal status or missing  
87 age at menopause, or have discordance between reported timing of bilateral  
88 oophorectomy and age at menopause. Further, women will be excluded if they have

89 congenital heart disease or if they already have any of the 8 cardiovascular diagnoses  
 90 under study at enrollment (i.e., women with prevalent cardiovascular disease will be  
 91 excluded).

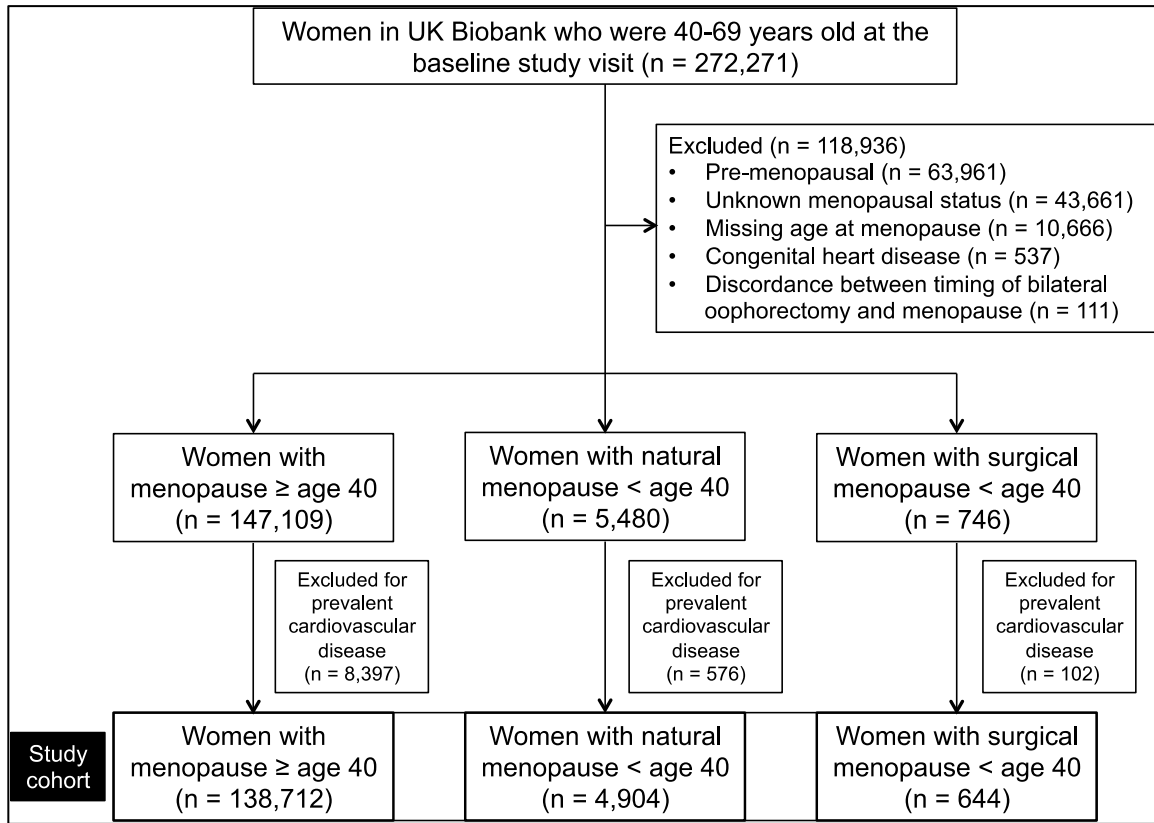

92  
 93 **iii. Exposures and their measurement:** For the primary analysis, the exposures will be  
 94 premature natural menopause, defined as age at menopause <40 years without  
 95 accompany bilateral oophorectomy, and premature surgical menopause, defined as  
 96 bilateral oophorectomy < age 40. In secondary analyses, alternate menopausal age  
 97 thresholds will additionally be studied (menopause <30 years, <35 years, <45 years, <50  
 98 years). Age at menopause and history of bilateral oophorectomy were systematically  
 99 collected by survey at study enrollment.

100 **iv. Outcomes and their measurement:** Because many cardiovascular conditions are not  
 101 independent, the primary outcome will be a composite of incident coronary artery

102 disease, heart failure, aortic stenosis, mitral regurgitation, atrial fibrillation, ischemic  
103 stroke, peripheral artery disease, and venous thromboembolism, to be analyzed in a time-  
104 to-first diagnosis fashion. Secondary outcomes will be incident hypertension,  
105 hyperlipidemia, and T2DM, as well as individual components of the composite primary  
106 outcome. Outcomes will be ascertained by the appearance of a qualifying ICD code in the  
107 subject's medical record, which is linked to the UK Biobank study record.

108 *v. Confounders and their measurement:* Conventional cardiovascular risk factors (e.g.,  
109 chronic hypertension, hyperlipidemia, diabetes, smoking) were captured at enrollment by  
110 participant self-report and/or ICD code. Additionally, medication use was captured at  
111 enrollment. All women were additionally asked about history of hormone-replacement  
112 therapy use, including date of starting and stopping therapy among users. Finally,  
113 participants reported whether they had any prior history of cancer at enrollment.

114 *vi. Analysis plan:* Baseline characteristics among the three groups in the primary analysis  
115 (premature natural menopause, premature surgical menopause, and menopause  $\geq$  age 40)  
116 will be compared using ANOVA for continuous variables and the Pearson's chi-squared  
117 test for categorical variables.

118 (a) To evaluate the association between premature menopause and incident  
119 hypertension, hyperlipidemia, and T2DM, we will construct Cox proportional hazard  
120 models for each of these conditions, adjusted for age at enrollment, race, and the  
121 prevalent hypertension, hyperlipidemia and T2DM statuses not under consideration in  
122 each model to account for potential reverse causation. In these models, premature natural  
123 menopause, premature surgical menopause, and no premature menopause will be a  
124 single, non-ordered, categorical variable with no premature menopause as the reference

125 group. In secondary models to directly compare the hazards associated with premature  
126 natural and surgical menopause, premature natural menopause will serve as the reference  
127 group. To further account for reverse causation, we will run additional secondary models  
128 eliminating women with incident cardiovascular diagnoses during the study period. The  
129 proportional hazards assumption will be tested using Schoenfeld residuals, with  
130 additional stratified models run as needed to satisfy the assumption.

131 (b) To evaluate the association between premature menopause and incident  
132 cardiovascular disease, Cox models will assess time to first cardiovascular diagnosis  
133 (primary outcome) and incident coronary artery disease, heart failure, aortic stenosis,  
134 mitral regurgitation, atrial fibrillation, ischemic stroke, peripheral artery disease, and  
135 venous thromboembolism. As above, premature natural menopause, premature surgical  
136 menopause, and no premature menopause will constitute a categorical variable with no  
137 premature menopause as the reference group. Sparse models will adjust for age and race.  
138 Fully adjusted models will incorporate prevalent diabetes, ever-smoking, body mass  
139 index, systolic blood pressure, anti-hypertensive medication, non-HDL cholesterol,  
140 cholesterol-lowering medication, C-reactive protein, and ever-use of HRT.

141 (c) In a series of secondary models, we will incorporate multiple aspects of HRT  
142 use, including current HRT use, duration of HRT use, and delayed initiation of HRT  
143 following menopause (in analyses of the Women's Health Initiative and other large  
144 studies of HRT, these latter two factors have been associated with increased  
145 cardiovascular risk among HRT users). We will assess whether these aspects of HRT use  
146 are significantly associated with cardiovascular disease risk in our sample and whether

147 incorporating these factors changes the observed associations between premature  
148 menopause and cardiovascular disease.

149 (d) Because the menopausal age threshold of 40 years endorsed in recent  
150 guidelines is somewhat arbitrary, we will explore the association of alternate menopausal  
151 age thresholds (<30 years, <35 years, <45 years, and <50 years) with incident  
152 cardiovascular disease. These models will follow the same approach as (b) above.

153 *vii. Sample size/power calculation:* Our sample sizes are determined by the available  
154 dataset, which includes 4,904 women with premature natural menopause and 644 women  
155 with premature surgical menopause (see above figure), compared to a reference group of  
156 138,712 women without premature menopause. Assuming that  $\geq 1$  incident cardiovascular  
157 diagnosis will occur in 5% of women in our sample during follow-up, we have >99%  
158 power to detect a hazard ratio of 2.0 for time to first cardiovascular diagnosis in both  
159 premature natural and premature surgical menopause groups at an alpha level of 0.05.

160

### 161 **III. Strengths and limitations**

162 Strengths of this proposal include leveraging the UK Biobank to create the largest  
163 cohort of postmenopausal women to date to study the relationship between menopausal  
164 age and cardiovascular risk. The size and extensive phenotyping of the cohort enable us  
165 to adjust comprehensively for comorbidities and to study novel cardiovascular outcomes  
166 not previously addressed in the literature. Furthermore, the question of cardiovascular  
167 risk associated with premature menopause is timely given recent cholesterol and  
168 prevention guideline updates.



169           Limitations of the study include the possibility of misclassification given self-  
170 reported age at menopause and long duration since menopause for many women,  
171 although women were prompted to indicate if they did not know their menopausal age.  
172 Misclassification would be expected to bias our estimated effects toward the null. Given  
173 that women enrolled over a three-decade range of ages and women with prevalent  
174 cardiovascular disease will be excluded, magnitude of effect may be underestimated,  
175 particularly in older age strata. Further, a “healthy participant” bias has been noted in the  
176 UK Biobank,<sup>20</sup> and it is possible sicker women with a history of premature menopause  
177 may have been less likely to enroll. In women with prevalent cardiovascular risk factors,  
178 we are unable to ascertain whether the risk factors predated menopause or developed  
179 subsequently; the baseline risk factor profile of subjects at enrollment and our analysis of  
180 incident hypertension, hyperlipidemia, and T2DM will provide insight into the  
181 importance or unimportance of this limitation.

182

183

184 **References**

- 185 1. Mozaffarian D, Benjamin EJ, Go AS, et al. Heart Disease and Stroke Statistics-  
186 2016 Update: A Report From the American Heart Association. *Circulation*.  
187 2016;133(4):e38-360.
- 188 2. Bairey Merz CN, Andersen H, Sprague E, et al. Knowledge, Attitudes, and  
189 Beliefs Regarding Cardiovascular Disease in Women: The Women's Heart  
190 Alliance. *J Am Coll Cardiol*. 2017;70(2):123-132.
- 191 3. Shifren JL, Gass ML, Group NRfCCoMWW. The North American Menopause  
192 Society recommendations for clinical care of midlife women. *Menopause*.  
193 2014;21(10):1038-1062.
- 194 4. Gold EB, Bromberger J, Crawford S, et al. Factors associated with age at natural  
195 menopause in a multiethnic sample of midlife women. *Am J Epidemiol*.  
196 2001;153(9):865-874.
- 197 5. Manson JE, Woodruff TK. Reproductive Health as a Marker of Subsequent  
198 Cardiovascular Disease: The Role of Estrogen. *JAMA Cardiol*. 2016;1(7):776-  
199 777.
- 200 6. Velez MP, Alvarado BE, Rosendaal N, et al. Age at natural menopause and  
201 physical functioning in postmenopausal women: the Canadian Longitudinal Study  
202 on Aging. *Menopause*. 2019.
- 203 7. Sullivan SD, Lehman A, Nathan NK, Thomson CA, Howard BV. Age of  
204 menopause and fracture risk in postmenopausal women randomized to calcium +  
205 vitamin D, hormone therapy, or the combination: results from the Women's  
206 Health Initiative Clinical Trials. *Menopause*. 2017;24(4):371-378.
- 207 8. Nelson LM. Clinical practice. Primary ovarian insufficiency. *N Engl J Med*.  
208 2009;360(6):606-614.
- 209 9. Muka T, Oliver-Williams C, Kunutsor S, et al. Association of Age at Onset of  
210 Menopause and Time Since Onset of Menopause With Cardiovascular Outcomes,  
211 Intermediate Vascular Traits, and All-Cause Mortality: A Systematic Review and  
212 Meta-analysis. *JAMA Cardiol*. 2016;1(7):767-776.
- 213 10. Ley SH, Li Y, Tobias DK, et al. Duration of Reproductive Life Span, Age at  
214 Menarche, and Age at Menopause Are Associated With Risk of Cardiovascular  
215 Disease in Women. *J Am Heart Assoc*. 2017;6(11).
- 216 11. Peters SA, Woodward M. Women's reproductive factors and incident  
217 cardiovascular disease in the UK Biobank. *Heart*. 2018;104(13):1069-1075.
- 218 12. Roeters van Lennep JE, Heida KY, Bots ML, Hoek A, Disorders  
219 cotDMGDGoCRMaR. Cardiovascular disease risk in women with premature  
220 ovarian insufficiency: A systematic review and meta-analysis. *Eur J Prev*  
221 *Cardiol*. 2016;23(2):178-186.
- 222 13. de Kleijn MJ, van der Schouw YT, Verbeek AL, Peeters PH, Banga JD, van der  
223 Graaf Y. Endogenous estrogen exposure and cardiovascular mortality risk in  
224 postmenopausal women. *Am J Epidemiol*. 2002;155(4):339-345.
- 225 14. van der Schouw YT, van der Graaf Y, Steyerberg EW, Eijkemans JC, Banga JD.  
226 Age at menopause as a risk factor for cardiovascular mortality. *Lancet*.  
227 1996;347(9003):714-718.

228 15. Wellons M, Ouyang P, Schreiner PJ, Herrington DM, Vaidya D. Early menopause  
229 predicts future coronary heart disease and stroke: the Multi-Ethnic Study of  
230 Atherosclerosis. *Menopause*. 2012;19(10):1081-1087.

231 16. Hall PS, Nah G, Howard BV, et al. Reproductive Factors and Incidence of Heart  
232 Failure Hospitalization in the Women's Health Initiative. *J Am Coll Cardiol*.  
233 2017;69(20):2517-2526.

234 17. Grundy SM, Stone NJ, Bailey AL, et al. 2018  
235 AHA/ACC/AACVPR/AAPA/ABC/ACPM/ADA/AGS/APhA/ASPC/NLA/PCNA  
236 Guideline on the Management of Blood Cholesterol: Executive Summary: A  
237 Report of the American College of Cardiology/American Heart Association Task  
238 Force on Clinical Practice Guidelines. *J Am Coll Cardiol*. 2018.

239 18. Arnett DK, Blumenthal RS, Albert MA, et al. 2019 ACC/AHA Guideline on the  
240 Primary Prevention of Cardiovascular Disease. *Circulation*.  
241 2019:CIR00000000000000678.

242 19. Dam V, van der Schouw YT, Onland-Moret NC, et al. Association of menopausal  
243 characteristics and risk of coronary heart disease: a pan-European case-cohort  
244 analysis. *Int J Epidemiol*. 2019.

245 20. Fry A, Littlejohns TJ, Sudlow C, et al. Comparison of Sociodemographic and  
246 Health-Related Characteristics of UK Biobank Participants With Those of the  
247 General Population. *Am J Epidemiol*. 2017;186(9):1026-1034.  
248
