# Supplementary material
Source: PubMed Central journal article supplement (PMC8370013)
Supplement: jama-322-2411-s002.pdf [file jama-322-2411-s002.pdf]

## Supplementary Online Content

Honigberg MC, Zekavat SM, Aragam K, et al. Association of premature natural and surgical menopause with incident cardiovascular disease. *JAMA*.  
doi:10.1001/jama.2019.19191

### eResults

**eTable 1.** Complete Results of Fully Adjusted Cox Proportional Hazards Model for Time-to-First Cardiovascular Diagnosis (Primary Outcome)

**eTable 2.** Sensitivity Analysis: Sub-distribution Hazards for Incident Cardiovascular Disease Derived From Fine-Gray Competing Risk Regression Models, Incorporating Noncardiovascular Death as a Competing Risk

**eTable 3.** Sensitivity Analysis: Hazard Ratios for Incident Cardiovascular Diagnoses in Postmenopausal Women, With and Without Imputed Data to Replace Missing Covariates in Fully Adjusted Models

**eTable 4.** Sensitivity Analysis: Hazard Ratios for Incident Cardiovascular Diagnoses in Postmenopausal Women With History of Premature Natural and Surgical Menopause (< 40 Years), Eliminating 772 Women With Incident Heart Failure and 46 Women With Missing Heart Failure Data

**eTable 5.** Sensitivity Analysis: Hazard Ratios for Incident Cardiovascular Diagnoses in Postmenopausal Women With History of Premature Natural and Surgical Menopause (< 40 Years), Eliminating 15,017 Women With Any Prevalent Cancer at Enrollment and 436 Women With Missing Data on Prevalent Cancer Diagnosis at Enrollment

**eTable 6.** Sensitivity Analysis: Hazard Ratios for Incident Cardiovascular Diagnoses in Postmenopausal Women With History of Premature Natural and Surgical Menopause (< 40 years), Eliminating 39,281 Women With >1 Year of Menopausal Hormone Therapy Use, 9,456 With Current Menopausal Hormone Therapy Use at Study Enrollment, 4,441 Women With Missing Data on Duration of Prior Menopausal Hormone Therapy Use, and 345 Women With Missing Data on Ever-Use of Menopausal Hormone Therapy

**eTable 7.** Sensitivity Analysis: Hazards of Incident Cardiovascular Disease Diagnoses Associated With Natural Premature Menopause (i.e., Menopause Before Age 40), Comparing Model Results With and Without Inclusion of 2,524 Women With Prior Hysterectomy in the Group With Natural Premature Menopause

**eTable 8.** Sensitivity Analysis: Hazard Ratios for Incident Cardiovascular Diagnoses, Stratified by Body Mass Index at Study Enrollment

**eTable 9.** Sensitivity Analysis: Hazard Ratios for Incident Cardiovascular Diagnoses in Postmenopausal Women Who Were  $\geq 55$  Years Old at Study Enrollment

**eTable 10.** Sensitivity Analysis: Hazard Ratios for Incident Cardiovascular Diagnoses in Postmenopausal Women Who Used Menopausal Hormone Therapy for  $\geq 5$  Years Prior to Study Enrollment, Not Including Women Using Menopausal Hormone Therapy at Study Enrollment

**eTable 11.** Hazard Ratios for Incident Cardiovascular Diagnoses in Postmenopausal Women Compared to a Reference Group of Women Who Were Premenopausal at Study Enrollment

**eTable 12.** Sensitivity Analysis: Comparison of Models With and Without Adjustment for Ever Use of Menopausal Hormone Therapy

**eTable 13.** Associations of Use of Menopausal Hormone Therapy With Incident Cardiovascular Outcomes

**eTable 14.** Hazard Ratios Associated With Different Menopausal Age Thresholds for First Incident Cardiovascular Diagnosis and Eight Separate Cardiovascular Disease Diagnoses, Compared With a Reference Group of Women With Menopause  $\geq$  50 Years

**eTable 15.** Incident Development of Hypertension, Hyperlipidemia, and Type 2 Diabetes, Stratified by Age at Study Enrollment

**eTable 16.** Sensitivity Analysis: Subdistribution Hazards for Incident Hypertension, Hyperlipidemia, and Type 2 Diabetes From Fine-Gray Competing Risk Regression Models, Incorporating Death as a Competing Risk

**eTable 17.** Sensitivity Analysis: Incident Development of Cardiovascular Risk Factors, Excluding 5,756 Women With Any Incident Cardiovascular Disease Diagnosis

**eTable 18.** Hazards of Incident Hypertension, Hyperlipidemia, and Type 2 Diabetes by Age at Menopause Compared With Women With Menopause  $\geq$  Age 50

**eAppendix.** ICD Codes Used to Identify Women With Congenital Heart Disease and to Ascertain Diagnoses of Cardiovascular Risk Factors and Cardiovascular Diseases

This supplementary material has been provided by the authors to give readers additional information about their work.

## **eResults.**

**Missing data:** Laboratory values (non-HDL-C [15%] and C-reactive protein [7%]) were the most common missing covariates. Antihypertensive medication use was found to be associated with missing non-HDL-C ( $P=0.02$ ). BMI ( $P<0.001$ ), systolic blood pressure ( $P=0.005$ ), and antihypertensive medication use ( $P=0.004$ ) were associated with missing C-reactive protein. In secondary analyses, these variables were in turn incorporated as covariates in prediction models, along with age and sex, to impute missing data values.

### **Sensitivity analyses:**

*Primary and secondary cardiovascular outcomes:* Sensitivity analysis incorporating non-cardiovascular death as a competing risk yielded nearly identical hazards (**eTable 2**). Models using imputed data to replace missing covariates also yielded similar results (**eTable 3**). Sensitivity analyses excluding women with incident heart failure (**eTable 4**), history of cancer (**eTable 5**), and current or prior menopausal hormone therapy (MHT) use  $>1$  year (**eTable 6**) yielded similar results, as did analysis excluding women with history of ever-hysterectomy from the natural premature menopause group (**eTable 7**). In models stratified by BMI category, risks associated with premature menopause were not restricted to a particular BMI subset (**eTable 8**). Results of sensitivity analyses restricted to women aged  $\geq 55$  years old at enrollment (**eTable 9**) and with  $\geq 5$  years of prior MHT (**eTable 10**) use also recapitulated results of the primary and secondary analyses. In addition, results were consistent when incorporating premenopausal women in the UK Biobank as the reference group (**eTable 11**).

*Incident cardiovascular risk factors:* Results were similar when competing risk regression was used, incorporating death as a competing risk (**eTable 16**). In sensitivity analyses to assess possible reverse causation, similar hazards were observed after excluding women with any incident cardiovascular disease (**eTable 17**). An inverse dose-responsive relationship was observed between age at menopause and risk for acquiring cardiovascular disease risk factors (**eTable 18**).

**eTable 1.** Complete Results of Fully Adjusted Cox Proportional Hazards Model for Time-to-First Cardiovascular Diagnosis (Primary Outcome).

| <b>Variable</b>                                    | <b>Hazard ratio (95% CI)</b> | <b>P-value</b> |
|----------------------------------------------------|------------------------------|----------------|
| Surgical premature menopause                       | 1.87 (1.36-2.58)             | <0.001         |
| Natural premature menopause                        | 1.36 (1.19-1.56)             | <0.001         |
| Age (years)                                        | 0.88 (0.79-0.99)             | 0.03           |
| Age <sup>2</sup> (years <sup>2</sup> )             | 1.002 (1.00-1.003)           | <0.001         |
| Non-white race                                     | 0.91 (0.78-1.07)             | 0.27           |
| Prevalent type 2 diabetes mellitus                 | 1.65 (1.41-1.93)             | <0.001         |
| Ever-smoking                                       | 1.20 (1.13-1.28)             | <0.001         |
| Systolic blood pressure at study enrollment (mmHg) | 1.004 (1.002-1.005)          | <0.001         |
| Antihypertensive medication use at enrollment      | 1.43 (1.33-1.53)             | <0.001         |
| Non-high-density lipoprotein cholesterol (mg/dL)   | 1.03 (1.00-1.06)             | 0.04           |
| Cholesterol-lowering medication use at enrollment  | 1.37 (1.26-1.49)             | <0.001         |
| Body-mass index (kg/m <sup>2</sup> )               | 1.02 (1.02-1.03)             | <0.001         |
| Log-transformed C-reactive protein                 | 1.18 (1.15-1.22)             | <0.001         |
| Ever-use of menopausal hormone therapy             | 1.04 (0.98-1.11)             | 0.20           |

The primary outcome was a composite of coronary artery disease, heart failure, aortic stenosis, mitral regurgitation, atrial fibrillation, ischemic stroke, peripheral artery disease, and venous thromboembolism.

Hazard ratios (HRs), 95% confidence intervals (CIs), and P-values are derived from a Cox proportional hazard model. The model was adjusted for all covariates listed in the left-hand column.

**eTable 2.** Sensitivity Analysis: Sub-distribution Hazards for Incident Cardiovascular Disease Derived From Fine-Gray Competing Risk Regression Models, Incorporating Noncardiovascular Death as a Competing Risk.

|                                         | Surgical premature menopause     |         | Natural premature menopause      |         |
|-----------------------------------------|----------------------------------|---------|----------------------------------|---------|
|                                         | Sub-distribution hazard (95% CI) | P-value | Sub-distribution hazard (95% CI) | P-value |
| First cardiovascular disease diagnosis* | 1.87 (1.35-2.60)                 | <0.001  | 1.36 (1.18-1.56)                 | <0.001  |
| Coronary artery disease                 | 2.52 (1.46-4.35)                 | <0.001  | 1.38 (1.06-1.81)                 | 0.02    |
| Heart failure                           | 2.49 (1.17-5.29)                 | 0.02    | 1.21 (0.80-1.84)                 | 0.36    |
| Aortic stenosis                         | 2.92 (0.95-9.01)                 | 0.06    | 2.38 (1.48-3.83)                 | <0.001  |
| Mitral regurgitation                    | 4.13 (1.64-10.35)                | 0.003   | 0.71 (0.33-1.53)                 | 0.38    |
| Atrial fibrillation                     | 1.61 (0.90-2.87)                 | 0.11    | 1.25 (1.00-1.58)                 | 0.06    |
| Ischemic stroke                         | 0.44 (0.06-3.15)                 | 0.41    | 1.50 (1.01-2.29)                 | 0.04    |
| Peripheral artery disease               | 1.36 (0.33-5.58)                 | 0.67    | 1.33 (0.75-2.25)                 | 0.29    |
| Venous thromboembolism                  | 2.76 (1.48-5.17)                 | 0.001   | 1.71 (1.27-2.29)                 | <0.001  |

\* Comprised of coronary artery disease, heart failure, aortic stenosis, mitral regurgitation, atrial fibrillation, ischemic stroke, peripheral artery disease, and venous thromboembolism

Hazard ratios (HRs), 95% confidence intervals (CIs), and P-values are derived from competing risk regression models.

Models adjusted for age, race, prevalent type 2 diabetes mellitus, ever-smoking, systolic blood pressure, use of anti-hypertensive medication, non-HDL cholesterol, use of cholesterol-lowering medication, body-mass index, C-reactive protein, and history of menopausal hormone therapy use

**eTable 3.** Sensitivity Analysis: Hazard Ratios for Incident Cardiovascular Diagnoses in Postmenopausal Women, With and Without Imputed Data to Replace Missing Covariates in Fully Adjusted Models.

|                                          | Surgical premature menopause |         |                  |         | Natural premature menopause |         |                  |         |
|------------------------------------------|------------------------------|---------|------------------|---------|-----------------------------|---------|------------------|---------|
|                                          | Model 1                      |         | Model 2          |         | Model 1                     |         | Model 2          |         |
|                                          | HR (95% CI)                  | P-value | HR (95% CI)      | P-value | HR (95% CI)                 | P-value | HR (95% CI)      | P-value |
| First incident cardiovascular diagnosis* | 1.87 (1.36-2.58)             | <0.001  | 1.84 (1.38-2.44) | <0.001  | 1.36 (1.19-1.56)            | <0.001  | 1.41 (1.25-1.58) | <0.001  |
| Coronary artery disease                  | 2.52 (1.48-4.29)             | <0.001  | 2.80 (1.79-4.36) | <0.001  | 1.39 (1.06-1.82)            | 0.02    | 1.51 (1.20-1.90) | <0.001  |
| Heart failure                            | 2.57 (1.21-5.47)             | 0.01    | 2.36 (1.22-4.58) | 0.01    | 1.21 (0.81-1.82)            | 0.35    | 1.39 (1.01-1.93) | 0.04    |
| Aortic stenosis                          | 2.91 (0.92-9.15)             | 0.06    | 2.79 (1.03-7.54) | 0.04    | 2.37 (1.47-3.82)            | <0.001  | 2.15 (1.39-3.31) | <0.001  |
| Mitral regurgitation                     | 4.13 (1.69-10.11)            | 0.002   | 3.16 (1.30-7.69) | 0.01    | 0.73 (0.34-1.55)            | 0.41    | 0.90 (0.49-1.65) | 0.73    |
| Atrial fibrillation                      | 1.60 (0.91-2.83)             | 0.11    | 1.61 (0.98-2.64) | 0.06    | 1.25 (1.00-1.58)            | 0.05    | 1.30 (1.06-1.59) | 0.01    |
| Ischemic stroke                          | 0.43 (0.06-3.12)             | 0.41    | 0.99 (0.32-3.07) | 0.98    | 1.50 (1.01-2.25)            | 0.04    | 1.43 (1.00-2.05) | 0.05    |
| Peripheral artery disease                | 1.34 (0.33-5.41)             | 0.68    | 1.55 (0.49-4.85) | 0.45    | 1.34 (0.79 - 2.26)          | 0.27    | 1.47 (0.94-2.29) | 0.09    |
| Venous thromboembolism                   | 2.73 (1.46-5.14)             | 0.002   | 2.26 (1.24-4.11) | 0.008   | 1.70 (1.27-2.29)            | <0.001  | 1.56 (1.19-2.04) | 0.001   |

\* Comprised of coronary artery disease, heart failure, aortic stenosis, mitral regurgitation, atrial fibrillation, ischemic stroke, peripheral artery disease, and venous thromboembolism

Hazard ratios (HRs), 95% confidence intervals (CIs), and P-values are derived from Cox proportional hazard models.

Model 1: Adjusted for age, race, prevalent type 2 diabetes mellitus, ever-smoking, systolic blood pressure, use of anti-hypertensive medication, non-HDL cholesterol, use of cholesterol-lowering medication, body-mass index, C-reactive protein, and history of menopausal hormone therapy use, excluding 30,975 women with missing covariates

Model 2: Adjusted for age, race, prevalent type 2 diabetes mellitus, ever-smoking, systolic blood pressure, use of anti-hypertensive medication, non-HDL cholesterol, use of cholesterol-lowering medication, body-mass index, C-reactive protein, and history of menopausal hormone therapy use, using imputed data to replace missing covariates

**eTable 4.** Sensitivity Analysis: Hazard Ratios for Incident Cardiovascular Diagnoses in Postmenopausal Women With History of Premature Natural and Surgical Menopause (< 40 Years), Eliminating 772 Women With Incident Heart Failure and 46 Women With Missing Heart Failure Data (n = 143,442).

|                                          | Premature surgical menopause |         |                |         | Premature natural menopause |         |               |         |
|------------------------------------------|------------------------------|---------|----------------|---------|-----------------------------|---------|---------------|---------|
|                                          | Model 1                      |         | Model 2        |         | Model 1                     |         | Model 2       |         |
|                                          | HR (95% CI)                  | P-value | HR (95% CI)    | P-value | HR (95% CI)                 | P-value | HR (95% CI)   | P-value |
| First incident cardiovascular diagnosis* | 2.1 (1.6-2.9)                | <0.001  | 1.9 (1.3-2.7)  | <0.001  | 1.6 (1.4-1.8)               | <0.001  | 1.4 (1.2-1.6) | <0.001  |
| Coronary artery disease                  | 3.2 (2.0-5.4)                | <0.001  | 2.4 (1.3-4.5)  | 0.006   | 1.8 (1.4-2.3)               | <0.001  | 1.3 (0.9-1.8) | 0.11    |
| Aortic stenosis                          | 2.1 (0.5-8.5)                | 0.30    | 2.4 (0.6-9.8)  | 0.22    | 2.3 (1.4-3.8)               | <0.001  | 2.1 (1.2-3.6) | 0.01    |
| Mitral regurgitation                     | 3.8 (1.4-10.2)               | 0.008   | 3.7 (1.2-11.8) | 0.02    | 0.9 (0.5-1.9)               | 0.88    | 0.9 (0.4-2.0) | 0.78    |
| Atrial fibrillation                      | 1.8 (1.0-3.0)                | 0.04    | 1.7 (0.9-3.2)  | 0.09    | 1.5 (1.2-1.9)               | <0.001  | 1.4 (1.1-1.7) | 0.02    |

\* Comprised of coronary artery disease, heart failure, aortic stenosis, mitral regurgitation, atrial fibrillation, ischemic stroke, peripheral artery disease, and venous thromboembolism

Hazard ratios (HRs), 95% confidence intervals (CIs), and P-values are derived from Cox proportional hazard models.

Model 1: Adjusted for age at enrollment and race

Model 2: Adjusted for age, race, prevalent type 2 diabetes mellitus, ever-smoking, systolic blood pressure, use of anti-hypertensive medication, non-HDL cholesterol, use of cholesterol-lowering medication, body-mass index, C-reactive protein, and history of menopausal hormone therapy use

**eTable 5.** Sensitivity Analysis: Hazard Ratios for Incident Cardiovascular Diagnoses in Postmenopausal Women With History of Premature Natural and Surgical Menopause (< 40 Years), Eliminating 15,017 Women With Any Prevalent Cancer at Enrollment and 436 Women With Missing Data on Prevalent Cancer Diagnosis at Enrollment (n = 128,807).

|                                          | Premature surgical menopause |         |                |         | Premature natural menopause |         |               |         |
|------------------------------------------|------------------------------|---------|----------------|---------|-----------------------------|---------|---------------|---------|
|                                          | Model 1                      |         | Model 2        |         | Model 1                     |         | Model 2       |         |
|                                          | HR (95% CI)                  | P-value | HR (95% CI)    | P-value | HR (95% CI)                 | P-value | HR (95% CI)   | P-value |
| First incident cardiovascular diagnosis* | 2.2 (1.6-3.1)                | <0.001  | 1.9 (1.3-2.9)  | 0.001   | 1.6 (1.4-1.8)               | <0.001  | 1.4 (1.2-1.6) | <0.001  |
| Coronary artery disease                  | 3.5 (2.1-5.9)                | <0.001  | 2.2 (1.1-4.4)  | 0.03    | 1.9 (1.5-2.4)               | <0.001  | 1.4 (1.1-2.0) | 0.02    |
| Heart failure                            | 2.4 (1.0-5.7)                | 0.06    | 2.0 (0.6-6.2)  | 0.24    | 1.4 (1.0-2.1)               | 0.06    | 1.1 (0.6-1.8) | 0.75    |
| Aortic stenosis                          | 3.7 (1.2-11.5)               | 0.02    | 3.0 (0.7-12.2) | 0.12    | 2.5 (1.6-4.0)               | <0.001  | 2.3 (1.3-4.0) | 0.003   |
| Mitral regurgitation                     | 2.9 (0.9-8.9)                | 0.07    | 2.5 (0.6-10.2) | 0.20    | 1.0 (0.6-2.0)               | 0.90    | 0.9 (0.4-2.0) | 0.89    |
| Atrial fibrillation                      | 1.9 (1.1-3.4)                | 0.02    | 1.6 (0.8-3.2)  | 0.18    | 1.4 (1.1-1.7)               | 0.008   | 1.2 (0.9-1.6) | 0.19    |
| Ischemic stroke                          | 1.1 (0.3-4.5)                | 0.87    | 0.7 (0.1-5.2)  | 0.75    | 1.6 (1.1-2.4)               | 0.02    | 1.6 (1.0-2.5) | 0.04    |
| Peripheral artery disease                | 2.0 (0.5-8.1)                | 0.32    | 2.1 (0.5-8.5)  | 0.30    | 1.9 (1.1-3.0)               | 0.01    | 1.1 (0.6-2.2) | 0.74    |
| Venous thromboembolism                   | 2.5 (1.2-5.3)                | 0.02    | 1.8 (0.7-4.8)  | 0.24    | 1.8 (1.4-2.5)               | <0.001  | 1.7 (1.2-2.5) | 0.001   |

\* Comprised of coronary artery disease, heart failure, aortic stenosis, mitral regurgitation, atrial fibrillation, ischemic stroke, peripheral artery disease, and venous thromboembolism

Hazard ratios (HRs), 95% confidence intervals (CIs), and P-values are derived from Cox proportional hazard models.

Model 1: Adjusted for age and race

Model 2: Adjusted for age, race, prevalent type 2 diabetes mellitus, ever-smoking, systolic blood pressure, use of anti-hypertensive medication, non-HDL cholesterol, use of cholesterol-lowering medication, body-mass index, C-reactive protein, and history of menopausal hormone therapy use



**eTable 6.** Sensitivity Analysis: Hazard Ratios for Incident Cardiovascular Diagnoses in Postmenopausal Women With History of Premature Natural and Surgical Menopause (< 40 years), Eliminating 39,281 Women With >1 Year of Menopausal Hormone Therapy Use, 9,456 With Current Menopausal Hormone Therapy Use at Study Enrollment, 4,441 Women With Missing Data on Duration of Prior Menopausal Hormone Therapy Use, and 345 Women With Missing Data on Ever-Use of Menopausal Hormone Therapy (n = 90,737).

|                                          | Premature surgical menopause (n = 161) |         |                |         | Premature natural menopause (n = 1,851) |         |               |         |
|------------------------------------------|----------------------------------------|---------|----------------|---------|-----------------------------------------|---------|---------------|---------|
|                                          | Model 1                                |         | Model 2        |         | Model 1                                 |         | Model 2       |         |
|                                          | HR (95% CI)                            | P-value | HR (95% CI)    | P-value | HR (95% CI)                             | P-value | HR (95% CI)   | P-value |
| First incident cardiovascular diagnosis* | 2.5 (1.5-4.2)                          | <0.001  | 2.6 (1.4-4.7)  | 0.002   | 1.5 (1.3-1.9)                           | <0.001  | 1.4 (1.2-1.9) | <0.001  |
| Coronary artery disease                  | 4.2 (1.9-9.3)                          | <0.001  | 4.1 (1.7-9.8)  | 0.002   | 1.9 (1.3-2.7)                           | <0.001  | 1.8 (1.2-2.8) | 0.005   |
| Heart failure                            | 5.8 (2.4-14.0)                         | <0.001  | 6.9 (2.6-18.6) | <0.001  | 1.6 (1.0-2.7)                           | 0.07    | 1.8 (1.0-3.2) | 0.04    |
| Aortic stenosis                          | 3.0 (0.4-21.2)                         | 0.28    | 4.2 (0.6-30.0) | 0.16    | 2.5 (1.3-4.9)                           | 0.008   | 3.5 (1.7-6.9) | <0.001  |
| Mitral regurgitation                     | 8.1 (2.6-25.3)                         | <0.001  | 8.3 (2.0-33.8) | 0.003   | 0.3 (0-1.8)                             | 0.17    | 0.4 (0-2.6)   | 0.31    |
| Atrial fibrillation                      | 2.5 (1.1-5.7)                          | 0.02    | 2.4 (0.9-6.5)  | 0.08    | 1.3 (1.0-1.9)                           | 0.09    | 1.3 (0.9-2.0) | 0.16    |
| Ischemic stroke                          | 2.9 (0.7-11.5)                         | 0.14    | NA             | NA      | 0.4 (0.1-1.2)                           | 0.11    | 0.5 (0.2-1.7) | 0.30    |
| Peripheral artery disease                | 2.7 (0.4-19.1)                         | 0.33    | 3.2 (0.4-23.1) | 0.25    | 2.4 (1.3-4.6)                           | 0.006   | 1.5 (0.6-3.7) | 0.36    |
| Venous thromboembolism                   | 2.7 (0.9-8.5)                          | 0.08    | 1.2 (0.2-8.8)  | 0.83    | 2.0 (1.3-2.9)                           | 0.001   | 2.1 (1.3-3.3) | 0.001   |

\* Comprised of coronary artery disease, heart failure, aortic stenosis, mitral regurgitation, atrial fibrillation, ischemic stroke, peripheral artery disease, and venous thromboembolism

Hazard ratios (HRs), 95% confidence intervals (CIs), and P-values are derived from Cox proportional hazard models.

Model 1: Adjusted for age and race

Model 2: Adjusted for age, race, prevalent type 2 diabetes mellitus, ever-smoking, systolic blood pressure, use of anti-hypertensive medication, non-HDL cholesterol, use of cholesterol-lowering medication, body-mass index, and C-reactive protein

**eTable 7.** Sensitivity Analysis: Hazards of Incident Cardiovascular Disease Diagnoses Associated With **Natural Premature Menopause** (i.e., Menopause Before Age 40), Comparing Model Results With and Without Inclusion of 2,524 Women With Prior Hysterectomy in the Group With Natural Premature Menopause.

|                                         | No exclusion of women with hysterectomy |         |                    |         | Excluding 2,540 women with prior hysterectomy |         |                  |         |
|-----------------------------------------|-----------------------------------------|---------|--------------------|---------|-----------------------------------------------|---------|------------------|---------|
|                                         | Model 1                                 |         | Model 2            |         | Model 1                                       |         | Model 2          |         |
|                                         | HR (95% CI)                             | P-value | HR (95% CI)        | P-value | HR (95% CI)                                   | P-value | HR (95% CI)      | P-value |
| First cardiovascular disease diagnosis* | 1.60 (1.42-1.80)                        | <0.001  | 1.36 (1.19-1.56)   | <0.001  | 1.61 (1.34-1.92)                              | <0.001  | 1.34 (1.08-1.66) | 0.008   |
| Coronary artery disease                 | 1.81 (1.44-2.28)                        | <0.001  | 1.39 (1.06-1.82)   | 0.02    | 1.79 (1.27-2.53)                              | <0.001  | 1.38 (0.90-2.11) | 0.14    |
| Heart failure                           | 1.56 (1.14-2.16)                        | 0.006   | 1.21 (0.81-1.82)   | 0.35    | 1.78 (1.13-2.79)                              | 0.01    | 1.52 (0.87-2.65) | 0.14    |
| Aortic stenosis                         | 2.48 (1.62-3.80)                        | <0.001  | 2.37 (1.47-3.82)   | <0.001  | 2.33 (1.19-4.54)                              | 0.01    | 2.53 (1.24-5.17) | 0.01    |
| Mitral regurgitation                    | 0.95 (0.52-1.74)                        | 0.87    | 0.73 (0.34-1.55)   | 0.41    | 0.60 (0.19-1.88)                              | 0.38    | 0.73 (0.23-2.29) | 0.59    |
| Atrial fibrillation                     | 1.44 (1.18-1.77)                        | <0.001  | 1.25 (1.00-1.58)   | 0.05    | 1.25 (0.90-1.74)                              | 0.18    | 1.15 (0.79-1.69) | 0.46    |
| Ischemic stroke                         | 1.59 (1.12-2.28)                        | 0.01    | 1.50 (1.01-2.25)   | 0.04    | 2.13 (1.33-3.41)                              | 0.002   | 2.04 (1.19-3.49) | 0.009   |
| Peripheral artery disease               | 1.96 (1.27-3.03)                        | 0.002   | 1.34 (0.79 - 2.26) | 0.27    | 1.93 (1.00-3.75)                              | 0.05    | 0.91 (0.34-2.45) | 0.85    |
| Venous thromboembolism                  | 1.68 (1.29-2.20)                        | <0.001  | 1.70 (1.27-2.29)   | <0.001  | 1.62 (1.08-2.43)                              | 0.02    | 1.60 (1.01-2.53) | 0.04    |

\* Comprised of coronary artery disease, heart failure, aortic stenosis, mitral regurgitation, atrial fibrillation, ischemic stroke, peripheral artery disease, and venous thromboembolism

Hazard ratios (HRs), 95% confidence intervals (CIs), and P-values are derived from Cox proportional hazard models.

Model 1: Adjusted for age at enrollment and race

Model 2: Adjusted for age, race, prevalent type 2 diabetes mellitus, ever-smoking, systolic blood pressure, use of anti-hypertensive medication, non-HDL cholesterol, use of cholesterol-lowering medication, body-mass index, C-reactive protein, and history of menopausal hormone therapy use

**eTable 8.** Sensitivity Analysis: Hazard Ratios for Incident Cardiovascular Diagnoses, Stratified by Body-Mass Index (BMI) at Study Enrollment.

| Body-mass index at study enrollment                  | Surgical premature menopause |                          |                    | Natural premature menopause |                            |                    |
|------------------------------------------------------|------------------------------|--------------------------|--------------------|-----------------------------|----------------------------|--------------------|
|                                                      | <25<br>(n = 174)             | ≥25 and <30<br>(n = 238) | ≥30<br>(n = 217)   | <25<br>(n = 1,551)          | ≥25 and <30<br>(n = 1,856) | ≥30<br>(n = 1,407) |
|                                                      | HR (95% CI)                  | HR (95% CI)              | HR (95% CI)        | HR (95% CI)                 | HR (95% CI)                | HR (95% CI)        |
| First incident cardiovascular diagnosis <sup>+</sup> | 1.50 (0.67-3.36)             | 1.73 (1.02-2.94)*        | 2.13 (1.33-3.40)** | 1.78 (1.37-2.29)***         | 1.23 (0.81-1.55)           | 1.25 (0.99-1.57)   |
| Coronary artery disease                              | 2.65 (0.84-8.30)             | 1.59 (0.59-4.30)         | 3.37 (1.58-7.20)** | 1.56 (0.92-2.63)            | 1.46 (0.95-2.23)           | 1.22 (0.76-1.94)   |
| Heart failure                                        | 4.22 (1.03-17.28)*           | 1.88 (0.46-7.67)         | 2.54 (0.80-8.03)   | 2.84 (1.51-5.31)**          | 1.20 (0.61-2.35)           | 0.53 (0.22-1.28)   |
| Aortic stenosis                                      | 6.00 (0.81-44.34)            | NA                       | 4.85 (1.16-20.34)* | 1.32 (0.32-5.51)            | 2.75 (1.36-5.55)**         | 2.37 (1.12-4.99)*  |
| Mitral regurgitation                                 | 2.80 (0.38-20.39)            | 6.79 (2.09-22.00)        | 2.33 (0.31-17.09)  | 0.98 (0.31-3.11)            | 0.29 (0.04-2.09)           | 0.95 (0.30-2.06)   |
| Atrial fibrillation                                  | 1.45 (0.36-5.84)             | 1.38 (0.51-3.69)         | 1.89 (0.84-4.23)   | 1.42 (0.89-2.29)            | 1.12 (0.75-1.66)           | 1.29 (0.90-1.84)   |
| Ischemic stroke                                      | NA                           | 1.08 (0.15-7.78)         | NA                 | 2.17 (1.05-4.49)*           | 1.34 (0.68-2.62)           | 1.3 (0.66-2.57)    |
| Peripheral artery disease                            | 2.34 (0.32-17.23)            | 1.48 (0.20-10.76)        | NA                 | 1.51 (0.55-4.17)            | 1.34 (0.59-3.09)           | 1.16 (0.46-2.90)   |
| Venous thromboembolism                               | 2.69 (0.66-11.00)            | 1.50 (0.37-6.09)         | 3.74 (1.64-8.49)** | 2.36 (1.38-4.06)**          | 1.65 (1.01-2.71)*          | 1.39 (0.83-2.32)   |

\*P<0.05; \*\*P<0.01; \*\*\*P<0.001

<sup>+</sup> Comprised of coronary artery disease, heart failure, aortic stenosis, mitral regurgitation, atrial fibrillation, ischemic stroke, peripheral artery disease, and venous thromboembolism

Hazard ratios (HRs), 95% confidence intervals (CIs), and P-values are derived from Cox proportional hazard models.

Models adjusted for age, race, prevalent type 2 diabetes mellitus, ever-smoking, systolic blood pressure, use of anti-hypertensive medication, non-HDL cholesterol, use of cholesterol-lowering medication, body-mass index, C-reactive protein, and history of menopausal hormone therapy use

**eTable 9.** Sensitivity Analysis: Hazard Ratios for Incident Cardiovascular Diagnoses in Postmenopausal Women Who Were ≥55 Years Old at Study Enrollment (n = 118,971).

|                                          | Surgical premature menopause |         |                   |         | Natural premature menopause |         |                  |         |
|------------------------------------------|------------------------------|---------|-------------------|---------|-----------------------------|---------|------------------|---------|
|                                          | Model 1                      |         | Model 2           |         | Model 1                     |         | Model 2          |         |
|                                          | HR (95% CI)                  | P-value | HR (95% CI)       | P-value | HR (95% CI)                 | P-value | HR (95% CI)      | P-value |
| First incident cardiovascular diagnosis* | 2.31 (1.71-3.12)             | <0.001  | 1.93 (1.36-2.73)  | <0.001  | 1.56 (1.37-1.77)            | <0.001  | 1.34 (1.16-1.55) | <0.001  |
| Coronary artery disease                  | 3.97 (2.49-6.32)             | <0.001  | 2.62 (1.48-4.64)  | <0.001  | 1.82 (1.43-2.31)            | <0.001  | 1.40 (1.06-1.86) | 0.02    |
| Heart failure                            | 3.10 (1.54-6.22)             | 0.001   | 2.75 (1.22-6.16)  | 0.01    | 1.35 (0.93-1.95)            | 0.12    | 1.06 (0.67-1.67) | 0.82    |
| Aortic stenosis                          | 2.94 (0.94-9.17)             | 0.06    | 2.28 (0.56-9.24)  | 0.25    | 2.37 (1.50-3.73)            | <0.001  | 2.20 (1.31-3.69) | 0.002   |
| Mitral regurgitation                     | 4.18 (1.73-10.13)            | 0.002   | 5.26 (2.16-12.82) | <0.001  | 0.91 (0.47-1.76)            | 0.77    | 0.75 (0.33-1.70) | 0.49    |
| Atrial fibrillation                      | 1.83 (1.08-3.10)             | 0.02    | 1.52 (0.81-2.83)  | 0.19    | 1.47 (1.20-1.81)            | <0.001  | 1.28 (1.01-1.62) | 0.04    |
| Ischemic stroke                          | 1.39 (0.45-4.32)             | 0.57    | 0.53 (0.07-3.75)  | 0.52    | 1.68 (1.17-2.43)            | 0.005   | 1.58 (1.04-2.36) | 0.03    |
| Peripheral artery disease                | 2.47 (0.79-7.69)             | 0.12    | 1.55 (0.38-6.24)  | 0.54    | 1.84 (1.16-2.92)            | 0.01    | 1.26 (0.72-2.21) | 0.42    |
| Venous thromboembolism                   | 2.75 (1.43-5.30)             | 0.003   | 2.97 (1.47-5.97)  | 0.002   | 1.57 (1.16-2.12)            | 0.003   | 1.62 (1.16-2.25) | 0.004   |

\* Comprised of coronary artery disease, heart failure, aortic stenosis, mitral regurgitation, atrial fibrillation, ischemic stroke, peripheral artery disease, and venous thromboembolism

Hazard ratios (HRs), 95% confidence intervals (CIs), and P-values are derived from Cox proportional hazard models.

Model 1: Adjusted for age and race

Model 2: Adjusted for age, race, prevalent type 2 diabetes mellitus, ever-smoking, systolic blood pressure, use of anti-hypertensive medication, non-HDL cholesterol, use of cholesterol-lowering medication, body-mass index, C-reactive protein, and history of menopausal hormone therapy use

**eTable 10.** Sensitivity Analysis: Hazard Ratios for Incident Cardiovascular Diagnoses in Postmenopausal Women Who Used Menopausal Hormone Therapy for  $\geq 5$  Years Prior to Study Enrollment, Not Including Women Using Menopausal Hormone Therapy at Study Enrollment (n = 28,083).

|                                          | Surgical premature menopause |         |                   |         | Natural premature menopause |         |                  |         |
|------------------------------------------|------------------------------|---------|-------------------|---------|-----------------------------|---------|------------------|---------|
|                                          | Model 1                      |         | Model 2           |         | Model 1                     |         | Model 2          |         |
|                                          | HR (95% CI)                  | P-value | HR (95% CI)       | P-value | HR (95% CI)                 | P-value | HR (95% CI)      | P-value |
| First incident cardiovascular diagnosis* | 2.08 (1.36-3.18)             | <0.001  | 1.54 (0.92-2.58)  | 0.10    | 1.58 (1.30-1.94)            | <0.001  | 1.34 (1.07-1.69) | 0.01    |
| Coronary artery disease                  | 4.69 (2.62-8.39)             | <0.001  | 2.85 (1.33-6.09)  | 0.007   | 1.63 (1.10-2.43)            | 0.02    | 1.33 (0.83-2.13) | 0.24    |
| Heart failure                            | 2.03 (0.63-6.45)             | 0.23    | 0.82 (0.11-5.9)   | 0.84    | 1.22 (0.66-2.27)            | 0.52    | 0.65 (0.27-1.61) | 0.35    |
| Aortic stenosis                          | 3.33 (0.78-14.2)             | 0.10    | 1.55 (0.20-12.16) | 0.68    | 2.73 (1.33-5.60)            | 0.006   | 1.61 (0.66-3.90) | 0.29    |
| Mitral regurgitation                     | NA                           | NA      | NA                | NA      | 1.53 (0.70-3.33)            | 0.28    | 1.09 (0.39-3.02) | 0.87    |
| Atrial fibrillation                      | 1.76 (0.83-3.73)             | 0.14    | 1.47 (0.60-3.56)  | 0.40    | 1.56 (1.12-2.17)            | 0.008   | 1.27 (0.86-1.87) | 0.23    |
| Ischemic stroke                          | 0.80 (0.11-5.76)             | 0.82    | 0.83 (0.12-6.03)  | 0.86    | 1.98 (1.16-3.40)            | 0.01    | 1.86 (1.04-3.35) | 0.04    |
| Peripheral artery disease                | 1.41 (0.20-10.1)             | 0.73    | 1.55 (0.21-11.28) | 0.66    | 1.72 (0.83-3.56)            | 0.14    | 1.61 (0.73-3.53) | 0.24    |
| Venous thromboembolism                   | 3.23 (1.42-7.36)             | 0.005   | 3.00 (1.21-7.43)  | 0.02    | 1.40 (0.84-2.35)            | 0.20    | 1.25 (0.70-2.21) | 0.45    |

\* Comprised of coronary artery disease, heart failure, aortic stenosis, mitral regurgitation, atrial fibrillation, ischemic stroke, peripheral artery disease, and venous thromboembolism

Hazard ratios (HRs), 95% confidence intervals (CIs), and P-values are derived from Cox proportional hazard models.

Model 1: Adjusted for age and race

Model 2: Adjusted for age, race, prevalent type 2 diabetes mellitus, ever-smoking, systolic blood pressure, use of anti-hypertensive medication, non-HDL cholesterol, use of cholesterol-lowering medication, body-mass index, and C-reactive protein

**eTable 11.** Hazard Ratios for Incident Cardiovascular Diagnoses in Postmenopausal Women Compared With a Reference Group of Women Who Were Premenopausal at Study Enrollment.

|                                          | Surgical premature menopause |             |                   |             | Natural premature menopause |             |                   |             | Postmenopausal without premature menopause |             |                   |             |
|------------------------------------------|------------------------------|-------------|-------------------|-------------|-----------------------------|-------------|-------------------|-------------|--------------------------------------------|-------------|-------------------|-------------|
|                                          | Model 1                      |             | Model 2           |             | Model 1                     |             | Model 2           |             | Model 1                                    |             | Model 2           |             |
|                                          | HR<br>(95%<br>CI)            | P-<br>value | HR<br>(95%<br>CI) | P-<br>value | HR<br>(95%<br>CI)           | P-<br>value | HR<br>(95%<br>CI) | P-<br>value | HR<br>(95%<br>CI)                          | P-<br>value | HR<br>(95%<br>CI) | P-<br>value |
| First incident cardiovascular diagnosis* | 2.6 (1.9-3.5)                | <0.001      | 2.0 (1.4-2.9)     | <0.001      | 1.8 (1.6-2.2)               | <0.001      | 1.5 (1.2-1.8)     | <0.001      | 1.1 (1.0-1.3)                              | 0.04        | 1.1 (0.9-1.3)     | 0.26        |
| Coronary artery disease                  | 3.8 (2.3-6.3)                | <0.001      | 2.2 (1.2-3.9)     | 0.01        | 1.8 (1.3-2.5)               | <0.001      | 1.2 (0.8-1.8)     | 0.38        | 1.0 (0.8-1.3)                              | 0.95        | 0.9 (0.6-1.2)     | 0.31        |
| Heart failure                            | 4.5 (2.2-9.5)                | <0.001      | 4.2 (1.8-9.8)     | 0.001       | 2.5 (1.6-4.1)               | <0.001      | 1.9 (1.1-3.5)     | 0.03        | 1.6 (1.1-2.3)                              | 0.02        | 1.6 (1.0-2.5)     | 0.04        |
| Aortic stenosis                          | 7.2 (2.1-24.8)               | 0.002       | 5.6 (1.4-23.0)    | 0.02        | 5.2 (2.2-12.4)              | <0.001      | 4.5 (1.7-11.8)    | 0.002       | 2.1 (1.0-4.5)                              | 0.07        | 1.9 (0.8-4.6)     | 0.14        |
| Mitral regurgitation                     | 4.1 (1.5-11.2)               | 0.005       | 5.3 (1.9-14.9)    | 0.002       | 1.1 (0.5-2.4)               | 0.74        | 0.9 (0.4-2.3)     | 0.84        | 1.2 (0.7-2.0)                              | 0.53        | 1.2 (0.7-2.2)     | 0.49        |
| Atrial fibrillation                      | 2.2 (1.3-3.8)                | 0.005       | 1.9 (1.0-3.5)     | 0.04        | 1.7 (1.2-2.3)               | <0.001      | 1.5 (1.0-2.1)     | 0.03        | 1.2 (0.9-1.5)                              | 0.22        | 1.2 (0.9-1.5)     | 0.26        |
| Ischemic stroke                          | 1.4 (0.4-4.5)                | 0.62        | 0.5 (0.1-3.6)     | 0.47        | 1.8 (1.1-3.1)               | 0.03        | 1.6 (0.9-2.9)     | 0.12        | 1.1 (0.7-1.7)                              | 0.59        | 1.1 (0.7-1.7)     | 0.80        |
| Peripheral artery disease                | 2.0 (0.6-6.9)                | 0.26        | 1.2 (0.3-5.2)     | 0.84        | 1.8 (1.0-3.5)               | 0.07        | 1.2 (0.5-2.5)     | 0.68        | 0.9 (0.6-1.6)                              | 0.79        | 0.9 (0.5-1.6)     | 0.72        |
| Venous thromboembolism                   | 3.3 (1.7-6.3)                | <0.001      | 3.2 (1.6-6.2)     | <0.001      | 2.1 (1.5-3.1)               | <0.001      | 2.0 (1.3-2.9)     | 0.001       | 1.2 (1.0-1.6)                              | 0.10        | 1.2 (0.9-1.6)     | 0.33        |

\* Comprised of coronary artery disease, heart failure, aortic stenosis, mitral regurgitation, atrial fibrillation, ischemic stroke, peripheral artery disease, and venous thromboembolism

Hazard ratios (HRs), 95% confidence intervals (CIs), and P-values are derived from Cox proportional hazard models.

Model 1: Adjusted for age and race

Model 2: Adjusted for age, race, prevalent type 2 diabetes mellitus, ever-smoking, systolic blood pressure, use of anti-hypertensive medication, non-HDL cholesterol, use of cholesterol-lowering medication, body-mass index, C-reactive protein, and history of menopausal hormone therapy use

**eTable 12.** Sensitivity Analysis: Comparison of Models With and Without Adjustment for Ever Use of Menopausal Hormone Therapy.

|                                          | Premature surgical menopause |         |                |         | Premature natural menopause |         |               |         |
|------------------------------------------|------------------------------|---------|----------------|---------|-----------------------------|---------|---------------|---------|
|                                          | Model 1                      |         | Model 2        |         | Model 1                     |         | Model 2       |         |
|                                          | HR (95% CI)                  | P-value | HR (95% CI)    | P-value | HR (95% CI)                 | P-value | HR (95% CI)   | P-value |
| First incident cardiovascular diagnosis* | 2.1 (1.5-2.9)                | <0.001  | 2.0 (1.4-2.7)  | <0.001  | 1.4 (1.2-1.6)               | <0.001  | 1.4 (1.2-1.6) | <0.001  |
| Coronary artery disease                  | 2.9 (1.6-4.9)                | <0.001  | 2.7 (1.6-4.8)  | <0.001  | 1.4 (1.0-1.8)               | 0.04    | 1.3 (1.0-1.8) | 0.05    |
| Heart failure                            | 2.7 (1.2-6.0)                | 0.02    | 2.6 (1.2-5.9)  | 0.02    | 1.2 (0.7-1.8)               | 0.52    | 1.2 (0.7-1.8) | 0.53    |
| Aortic stenosis                          | 3.4 (1.1-10.6)               | 0.04    | 3.3 (1.0-10.4) | 0.04    | 2.4 (1.5-3.9)               | <0.001  | 2.4 (1.5-3.9) | <0.001  |
| Mitral regurgitation                     | 4.2 (1.6-11.3)               | 0.005   | 3.7 (1.4-10.0) | 0.01    | 0.9 (0.4-1.8)               | 0.69    | 0.8 (0.4-1.7) | 0.55    |
| Atrial fibrillation                      | 1.7 (1.0-3.1)                | 0.07    | 1.7 (0.9-3.0)  | 0.10    | 1.3 (1.0-1.7)               | 0.02    | 1.3 (1.0-1.6) | 0.04    |
| Ischemic stroke                          | 0.5 (0.1-3.9)                | 0.54    | 0.5 (0.1-3.6)  | 0.49    | 1.7 (1.1-2.5)               | 0.01    | 1.6 (1.1-2.4) | 0.02    |
| Peripheral artery disease                | 1.6 (0.4-6.4)                | 0.52    | 1.5 (0.4-6.2)  | 0.54    | 1.4 (0.8-2.4)               | 0.22    | 1.4 (0.8-2.4) | 0.25    |
| Venous thromboembolism                   | 2.2 (1.0-2.6)                | 0.04    | 2.1 (1.0-4.5)  | 0.04    | 1.7 (1.2-2.3)               | <0.001  | 1.7 (1.2-2.3) | 0.001   |

\* Comprised of coronary artery disease, heart failure, aortic stenosis, mitral regurgitation, atrial fibrillation, ischemic stroke, peripheral artery disease, and venous thromboembolism

Hazard ratios (HRs), 95% confidence intervals (CIs), and P-values are derived from Cox proportional hazard models.

Model 1: Adjusted for age, race, prevalent type 2 diabetes mellitus, ever-smoking, systolic blood pressure, use of anti-hypertensive medication, non-HDL cholesterol, use of cholesterol-lowering medication, body-mass index, and C-reactive protein

Model 2: Adjusted for age, race, prevalent type 2 diabetes mellitus, ever-smoking, systolic blood pressure, use of anti-hypertensive medication, non-HDL cholesterol, use of cholesterol-lowering medication, body-mass index, C-reactive protein, and history of menopausal hormone therapy use

**eTable 13.** Associations of Use of Menopausal Hormone Therapy With Incident Cardiovascular Outcomes. Values displayed are hazard ratio (95% confidence interval).

|                                                 | Premature surgical menopause | Premature natural menopause | Ever-use of MHT  | Current use of MHT | Duration of MHT use | Delayed initiation of MHT (≥5 years after menopause) |
|-------------------------------------------------|------------------------------|-----------------------------|------------------|--------------------|---------------------|------------------------------------------------------|
| <b>First incident cardiovascular diagnosis*</b> |                              |                             |                  |                    |                     |                                                      |
| Model 1                                         | 2.2 (1.7-2.9)***             | 1.6 (1.4-1.8)***            | 1.06 (1.0-1.1)*  |                    |                     |                                                      |
| Model 2                                         | 2.3 (1.7-3.0)***             | 1.6 (1.4-1.8)***            |                  | 0.98 (0.87-1.09)   |                     |                                                      |
| Model 3                                         | 2.6 (1.9-3.7)***             | 1.6 (1.4-1.9)***            |                  |                    | 0.99 (0.99-1.0)     |                                                      |
| Model 4                                         | 2.3 (1.7-3.1)***             | 1.7 (1.4-1.9)***            |                  |                    |                     | 1.1 (0.9-1.3)                                        |
| Model 5                                         | 2.6 (1.9-3.7)***             | 1.6 (1.4-1.9)***            |                  |                    | 0.99 (0.98-1.002)   | 1.06 (0.9-1.3)                                       |
| <b>Coronary artery disease</b>                  |                              |                             |                  |                    |                     |                                                      |
| Model 1                                         | 3.6 (2.3-5.5)***             | 1.8 (1.4-2.2)***            | 1.2 (1.0-1.3)**  |                    |                     |                                                      |
| Model 2                                         | 3.7 (2.4-5.8)***             | 1.8 (1.4-2.3)***            |                  | 1.06 (0.9-1.3)     |                     |                                                      |
| Model 3                                         | 4.5 (2.6-7.5)***             | 1.8 (1.3-2.5)***            |                  |                    | 0.99 (0.97-1.01)    |                                                      |
| Model 4                                         | 3.5 (2.1-5.9)***             | 1.8 (1.4-2.4)***            |                  |                    |                     | 1.1 (0.8-1.5)                                        |
| Model 5                                         | 4.5 (1.6-7.5)***             | 1.8 (1.3-2.5)***            |                  |                    | 0.99 (0.97-1.01)    | 1.0 (0.7-1.4)                                        |
| <b>Atrial fibrillation</b>                      |                              |                             |                  |                    |                     |                                                      |
| Model 1                                         | 1.8 (1.1-3.0)**              | 1.4 (1.2-1.8)***            | 1.07 (0.99-1.17) |                    |                     |                                                      |
| Model 2                                         | 1.9 (1.2-3.1)*               | 1.5 (1.2-1.8)***            |                  | 0.9 (0.7-1.1)      |                     |                                                      |
| Model 3                                         | 2.6 (1.4-4.6)**              | 1.6 (1.2-2.1)**             |                  |                    | 0.98 (0.97-0.997)*  |                                                      |
| Model 4                                         | 2.1 (1.2-3.6)**              | 1.5 (1.2-1.9)**             |                  |                    |                     | 1.2 (0.9-1.5)                                        |
| Model 5                                         | 2.6 (1.4-4.6)**              | 1.5 (1.2-2.0)**             |                  |                    | 0.98 (0.97-0.998)*  | 1.2 (0.9-1.5)                                        |
| <b>Venous thromboembolism</b>                   |                              |                             |                  |                    |                     |                                                      |
| Model 1                                         | 2.7 (1.5-5.0)***             | 1.7 (1.3-2.3)***            | 0.96 (0.8-1.1)   |                    |                     |                                                      |
| Model 2                                         | 2.8 (1.5-5.0)***             | 1.7 (1.3-2.3)***            |                  | 0.86 (0.7-1.1)     |                     |                                                      |
| Model 3                                         | 3.8 (1.9-7.8)***             | 1.6 (1.0-2.4)*              |                  |                    | 0.98 (0.96-0.998)*  |                                                      |
| Model 4                                         | 2.7 (1.4-5.2)**              | 1.5 (1.1-2.2)*              |                  |                    |                     | 1.06 (0.7-1.5)                                       |
| Model 5                                         | 3.8 (1.9-7.8)***             | 1.6 (1.0-2.4)*              |                  |                    | 0.98 (0.96-0.998)*  | 0.94 (0.6-1.5)                                       |

MHT = menopausal hormone therapy

+ Comprised of coronary artery disease, heart failure, aortic stenosis, mitral regurgitation, atrial fibrillation, ischemic stroke, peripheral artery disease, and venous thromboembolism

Hazard ratios (HRs), 95% confidence intervals (CIs), and P-values are derived from Cox proportional hazard models.

All models adjusted for age at enrollment and race

\*P<0.05; \*\*P<0.01; \*\*\*P<0.001



**eTable 14.** Hazard Ratios Associated With Different Menopausal Age Thresholds for First Incident Cardiovascular Diagnosis and Eight Separate Cardiovascular Disease Diagnoses, Compared With a Reference Group of Women With Menopause  $\geq$  50 Years.

| Age at menopause                                | Surgical menopause |         |                 |         | Natural menopause |         |                |         |
|-------------------------------------------------|--------------------|---------|-----------------|---------|-------------------|---------|----------------|---------|
|                                                 | Model 1            |         | Model 2         |         | Model 1           |         | Model 2        |         |
|                                                 | HR (95% CI)        | P-value | HR (95% CI)     | P-value | HR (95% CI)       | P-value | HR (95% CI)    | P-value |
| <b>First incident cardiovascular diagnosis*</b> |                    |         |                 |         |                   |         |                |         |
|                                                 | P(trend) = 0.03    |         |                 |         | P(trend) <0.001   |         |                |         |
| <30                                             | 3.4 (1.8-6.6)      | <0.001  | 2.3 (1.0-5.2)   | 0.04    | 1.6 (1.0-2.4)     | 0.03    | 1.3 (0.8-2.2)  | 0.23    |
| <35                                             | 3.0 (2.1-4.5)      | <0.001  | 2.3 (1.5-3.7)   | <0.001  | 1.7 (1.4-2.1)     | <0.001  | 1.5 (1.2-2.0)  | <0.001  |
| <40                                             | 2.4 (1.8-3.2)      | <0.001  | 2.1 (1.5-2.9)   | <0.001  | 1.7 (1.5-2.0)     | <0.001  | 1.4 (1.2-1.7)  | <0.001  |
| <45                                             | 1.7 (1.4-2.1)      | <0.001  | 1.4 (1.2-1.8)   | 0.001   | 1.5 (1.4-1.6)     | <0.001  | 1.3 (1.2-1.4)  | <0.001  |
| <50                                             | 1.5 (1.3-1.7)      | <0.001  | 1.2 (1.0-1.4)   | 0.02    | 1.3 (1.2-1.4)     | <0.001  | 1.2 (1.1-1.3)  | <0.001  |
| <b>Coronary artery disease</b>                  |                    |         |                 |         |                   |         |                |         |
|                                                 | P(trend) = 0.004   |         |                 |         | P(trend) = 0.02   |         |                |         |
| <30                                             | 6.5 (2.4-17.3)     | <0.001  | 2.7 (0.7-11.1)  | 0.16    | 2.5 (1.2-4.9)     | 0.01    | 1.6 (0.7-3.9)  | 0.31    |
| <35                                             | 5.4 (3.0-9.8)      | <0.001  | 3.5 (1.6-7.4)   | 0.001   | 2.0 (1.3-3.0)     | 0.001   | 1.6 (1.0-2.6)  | 0.07    |
| <40                                             | 4.2 (2.7-6.6)      | <0.001  | 2.9 (1.6-5.0)   | <0.001  | 2.0 (1.6-2.5)     | <0.001  | 1.4 (1.0-1.9)  | 0.03    |
| <45                                             | 1.8 (1.3-2.6)      | 0.002   | 1.4 (0.9-2.2)   | 0.15    | 1.6 (1.4-1.8)     | <0.001  | 1.3 (1.1-1.6)  | 0.01    |
| <50                                             | 1.6 (1.2-2.0)      | 0.001   | 1.2 (0.9-1.7)   | 0.22    | 1.4 (1.2-1.5)     | <0.001  | 1.3 (1.1-1.5)  | <0.001  |
| <b>Heart failure</b>                            |                    |         |                 |         |                   |         |                |         |
|                                                 | P(trend) = 0.20    |         |                 |         | P(trend) = 0.77   |         |                |         |
| <30                                             | 5.3 (1.3-21.7)     | 0.02    | 3.3 (0.5-23.7)  | 0.24    | 1.1 (0.3-4.3)     | 0.94    | 1.3 (0.3-5.4)  | 0.69    |
| <35                                             | 3.4 (1.3-9.1)      | 0.02    | 2.2 (0.5-9.0)   | 0.27    | 1.1 (0.5-2.3)     | 0.83    | 1.0 (0.4-2.4)  | 0.96    |
| <40                                             | 3.1 (1.6-6.0)      | 0.001   | 3.0 (1.3-6.9)   | 0.008   | 1.8 (1.3-2.5)     | <0.001  | 1.3 (0.8-2.1)  | 0.25    |
| <45                                             | 1.8 (1.1-2.9)      | 0.02    | 1.7 (1.0-3.1)   | 0.07    | 1.4 (1.2-1.8)     | <0.001  | 1.2 (0.9-1.5)  | 0.29    |
| <50                                             | 1.7 (1.2-2.4)      | 0.004   | 1.5 (1.0-2.3)   | 0.07    | 1.5 (1.3-1.7)     | <0.001  | 1.3 (1.1-1.6)  | 0.004   |
| <b>Aortic stenosis</b>                          |                    |         |                 |         |                   |         |                |         |
|                                                 | P(trend) = 0.004   |         |                 |         | P(trend) = 0.04   |         |                |         |
| <30                                             | 16.8 (5.1-55.1)    | <0.001  | 17.9 (5.4-59.1) | <0.001  | 3.6 (1.1-11.5)    | 0.03    | 3.6 (1.1-11.6) | 0.03    |
| <35                                             | 5.3 (1.7-17.3)     | 0.005   | 6.3 (1.9-20.9)  | 0.003   | 1.4 (0.5-3.8)     | 0.53    | 1.5 (0.5-4.2)  | 0.44    |
| <40                                             | 3.4 (1.2-9.1)      | 0.02    | 3.1 (1.0-9.8)   | 0.06    | 2.5 (1.6-3.9)     | <0.001  | 2.3 (1.4-3.9)  | 0.001   |
| <45                                             | 2.3 (1.2-4.6)      | 0.01    | 2.1 (1.0-4.6)   | 0.06    | 1.6 (1.1-2.2)     | 0.005   | 1.4 (0.9-2.1)  | 0.09    |
| <50                                             | 1.1 (0.6-2.1)      | 0.83    | 1.0 (0.5-2.2)   | 0.93    | 1.3 (1.0-1.6)     | 0.04    | 1.1 (0.8-1.5)  | 0.38    |

|                                  | Surgical menopause |         |                |         | Natural menopause |         |                |         |
|----------------------------------|--------------------|---------|----------------|---------|-------------------|---------|----------------|---------|
|                                  | Model 1            |         | Model 2        |         | Model 1           |         | Model 2        |         |
| Age at menopause                 | HR (95% CI)        | P-value | HR (95% CI)    | P-value | HR (95% CI)       | P-value | HR (95% CI)    | P-value |
| <b>Mitral regurgitation</b>      |                    |         |                |         |                   |         |                |         |
|                                  | P(trend) = 0.08    |         |                |         | P(trend) = 0.85   |         |                |         |
| <30                              | 6.4 (0.9-46.2)     | 0.06    | 8.0 (1.1-57.7) | 0.04    | 1.3 (0.2-9.1)     | 0.81    | 1.6 (0.2-11.4) | 0.65    |
| <35                              | 8.1 (3.0-21.9)     | <0.001  | 7.8 (2.4-24.9) | <0.001  | 1.1 (0.3-3.4)     | 0.89    | 1.4 (0.4-4.4)  | 0.57    |
| <40                              | 4.2 (1.7-10.3)     | 0.002   | 4.8 (1.7-13.1) | 0.002   | 1.1 (0.6-2.1)     | 0.66    | 1.0 (0.5-2.1)  | 0.97    |
| <45                              | 2.1 (1.1-4.2)      | 0.03    | 1.9 (0.8-4.4)  | 0.13    | 1.4 (1.0-1.9)     | 0.04    | 1.5 (1.0-2.2)  | 0.03    |
| <50                              | 1.6 (1.0-2.8)      | 0.06    | 1.2 (0.6-2.4)  | 0.64    | 1.5 (1.2-1.8)     | <0.001  | 1.5 (1.2-2.0)  | 0.001   |
| <b>Atrial fibrillation</b>       |                    |         |                |         |                   |         |                |         |
|                                  | P(trend) = 0.44    |         |                |         | P(trend) = 0.04   |         |                |         |
| <30                              | 2.8 (0.9-8.6)      | 0.08    | 3.0 (1.0-9.4)  | 0.06    | 1.4 (0.7-2.9)     | 0.30    | 1.6 (0.8-3.2)  | 0.20    |
| <35                              | 1.7 (0.8-3.8)      | 0.20    | 1.6 (0.7-3.9)  | 0.29    | 1.5 (1.1-2.2)     | 0.02    | 1.5 (1.0-2.3)  | 0.03    |
| <40                              | 1.9 (1.2-3.2)      | 0.008   | 1.6 (0.9-3.0)  | 0.11    | 1.5 (1.2-1.8)     | <0.001  | 1.3 (1.0-1.6)  | 0.04    |
| <45                              | 1.6 (1.2-2.1)      | 0.002   | 1.3 (0.9-1.9)  | 0.16    | 1.3 (1.2-1.5)     | <0.001  | 1.2 (1.0-1.4)  | 0.04    |
| <50                              | 1.3 (1.0-1.6)      | 0.03    | 1.0 (0.7-1.3)  | 0.96    | 1.2 (1.1-1.3)     | <0.001  | 1.1 (1.0-1.2)  | 0.03    |
| <b>Ischemic stroke</b>           |                    |         |                |         |                   |         |                |         |
|                                  | P(trend) = 0.75    |         |                |         | P(trend) = 0.19   |         |                |         |
| <30                              | NA                 | NA      | NA             | NA      | 1.3 (0.3-5.2)     | 0.72    | 1.5 (0.4-6.2)  | 0.55    |
| <35                              | 1.0 (0.1-7.1)      | 0.99    | 1.2 (0.2-8.4)  | 0.88    | 1.8 (1.0-3.4)     | 0.06    | 2.2 (1.1-4.1)  | 0.02    |
| <40                              | 1.3 (0.4-4.0)      | 0.66    | 0.5 (0.1-3.9)  | 0.54    | 1.7 (1.2-2.5)     | 0.004   | 1.7 (1.1-2.6)  | 0.01    |
| <45                              | 1.9 (1.1-3.2)      | 0.02    | 1.6 (0.8-3.0)  | 0.18    | 1.3 (1.0-1.7)     | 0.02    | 1.2 (0.9-1.6)  | 0.21    |
| <50                              | 1.4 (0.9-2.1)      | 0.14    | 1.1 (0.6-1.9)  | 0.73    | 1.2 (1.0-1.4)     | 0.04    | 1.2 (1.0-1.5)  | 0.04    |
| <b>Peripheral artery disease</b> |                    |         |                |         |                   |         |                |         |
|                                  | P(trend) = 0.62    |         |                |         | P(trend) = 0.06   |         |                |         |
| <30                              | 7.0 (1.0-50.1)     | 0.05    | NA             | NA      | 3.9 (1.3-12.3)    | 0.02    | 2.7 (0.7-11.2) | 0.16    |
| <35                              | 2.1 (0.3-14.9)     | 0.46    | NA             | NA      | 2.9 (1.4-5.9)     | 0.003   | 2.3 (1.0-5.2)  | 0.05    |
| <40                              | 2.6 (0.8-8.2)      | 0.10    | 1.9 (0.5-7.9)  | 0.36    | 2.3 (1.5-3.6)     | <0.001  | 1.7 (0.9-2.9)  | 0.08    |
| <45                              | 2.0 (1.0-4.0)      | 0.06    | 1.4 (0.6-3.3)  | 0.51    | 2.1 (1.6-2.8)     | <0.001  | 1.7 (1.2-2.4)  | 0.001   |
| <50                              | 1.7 (1.0-2.8)      | 0.05    | 1.5 (0.8-2.8)  | 0.17    | 1.6 (1.3-2.0)     | <0.001  | 1.4 (1.1-1.8)  | 0.01    |

|                               | Surgical menopause |         |                |         | Natural menopause |         |               |         |
|-------------------------------|--------------------|---------|----------------|---------|-------------------|---------|---------------|---------|
|                               | Model 1            |         | Model 2        |         | Model 1           |         | Model 2       |         |
| Age at menopause              | HR (95% CI)        | P-value | HR (95% CI)    | P-value | HR (95% CI)       | P-value | HR (95% CI)   | P-value |
| <b>Venous thromboembolism</b> |                    |         |                |         |                   |         |               |         |
|                               | P(trend) = 0.36    |         |                |         | P(trend) = 0.08   |         |               |         |
| <30                           | 2.1 (0.3-14.9)     | 0.46    | 2.4 (0.3-17.5) | 0.37    | 0.8 (0.2-3.2)     | 0.76    | 0.5 (0.1-3.5) | 0.47    |
| <35                           | 5.0 (2.5-10.1)     | <0.001  | 3.1 (1.1-8.4)  | 0.03    | 1.9 (1.2-3.1)     | 0.009   | 1.6 (0.9-2.9) | 0.10    |
| <40                           | 2.9 (1.6-5.3)      | <0.001  | 2.3 (1.1-5.0)  | 0.03    | 1.9 (1.4-2.5)     | <0.001  | 1.8 (1.3-2.5) | <0.001  |
| <45                           | 1.9 (1.3-2.8)      | 0.002   | 1.6 (0.9-2.6)  | 0.08    | 1.5 (1.3-1.8)     | <0.001  | 1.6 (1.3-1.9) | <0.001  |
| <50                           | 2.0 (1.5-2.6)      | <0.001  | 1.5 (1.1-2.2)  | 0.02    | 1.3 (1.2-1.5)     | <0.001  | 1.2 (1.1-1.5) | 0.005   |

\* Comprised of coronary artery disease, heart failure, aortic stenosis, mitral regurgitation, atrial fibrillation, ischemic stroke, peripheral artery disease, and venous thromboembolism

Hazard ratios (HRs), 95% confidence intervals (CIs), and P-values are derived from Cox proportional hazard models.

Groups are inclusive of all women with menopausal age below the listed cutoff.

Model 1: Adjusted for age and race

Model 2: Adjusted for age, race, prevalent type 2 diabetes mellitus, ever-smoking, systolic blood pressure, use of anti-hypertensive medication, non-HDL cholesterol, use of cholesterol-lowering medication, body-mass index, C-reactive protein, and history of menopausal hormone therapy use

**eTable 15.** Incident Development of Hypertension, Hyperlipidemia, and Type 2 Diabetes, Stratified by Age at Study Enrollment (5-Year Age Categories).

|                             | Age at enrollment (years) | Premature surgical menopause |         | Premature natural menopause |         |
|-----------------------------|---------------------------|------------------------------|---------|-----------------------------|---------|
|                             |                           | HR (95% CI)                  | P-value | HR (95% CI)                 | P-value |
| Hypertension*               | 40-44                     | 3.7 (0.8-17.5)               | 0.10    | 1.4 (0.4-5.5)               | 0.61    |
|                             | 45-49                     | 1.5 (0.4-6.4)                | 0.56    | 2.7 (1.5-4.9)               | <0.001  |
|                             | 50-54                     | 2.5 (0.9-6.7)                | 0.07    | 1.7 (1.1-2.7)               | 0.02    |
|                             | 55-59                     | 1.7 (0.6-4.6)                | 0.28    | 1.4 (1.0-2.0)               | 0.06    |
|                             | 60-64                     | 2.4 (1.2-4.6)                | 0.01    | 1.4 (1.1-1.8)               | 0.005   |
|                             | 65-69                     | 1.7 (0.9-3.3)                | 0.11    | 1.2 (0.9-1.6)               | 0.32    |
| Hyperlipidemia**            | 40-44                     | NA                           | NA      | 0.9 (0.2-3.9)               | 0.85    |
|                             | 45-49                     | 1.1 (0.2-8.3)                | 0.91    | 2.1 (0.9-4.5)               | 0.07    |
|                             | 50-54                     | 2.8 (1.1-7.7)                | 0.04    | 1.8 (1.0-3.0)               | 0.03    |
|                             | 55-59                     | 3.7 (1.7-7.7)                | <0.001  | 1.2 (0.8-1.8)               | 0.47    |
|                             | 60-64                     | 2.3 (1.1-4.6)                | 0.02    | 1.3 (1.0-1.8)               | 0.09    |
|                             | 65-69                     | 1.6 (0.8-3.4)                | 0.20    | 1.2 (0.8-1.6)               | 0.41    |
| Type 2 diabetes mellitus*** | 40-44                     | NA                           | NA      | 1.6 (0.2-12.3)              | 0.67    |
|                             | 45-49                     | 2.4 (0.6-10.2)               | 0.23    | 1.6 (0.6-3.8)               | 0.33    |
|                             | 50-54                     | 1.3 (0.3-5.0)                | 0.75    | 1.6 (1.0-2.7)               | 0.08    |
|                             | 55-59                     | 2.5 (1.0-5.9)                | 0.04    | 0.9 (0.5-1.7)               | 0.77    |
|                             | 60-64                     | 4.7 (2.6-8.5)                | <0.001  | 1.6 (1.2-2.2)               | 0.001   |
|                             | 65-69                     | 1.3 (0.5-3.1)                | 0.58    | 1.4 (1.1-2.0)               | 0.02    |

Hazard ratios (HRs), 95% confidence intervals (CIs), and P-values are derived from Cox proportional hazard models.

\*Models adjusted for age at study enrollment, race, body-mass index, prevalent hyperlipidemia, and prevalent type 2 diabetes mellitus

\*\*Models adjusted for age at study enrollment, race, body-mass index, prevalent hypertension, and prevalent type 2 diabetes mellitus

\*\*\*Models adjusted for age at study enrollment, race, body-mass index, prevalent hypertension, and prevalent hyperlipidemia

**eTable 16.** Sensitivity Analysis: Subdistribution Hazards for Incident Hypertension, Hyperlipidemia, and Type 2 Diabetes From Fine-Gray Competing Risk Regression Models, Incorporating Death as a Competing Risk.

|                             | Surgical premature menopause     |         | Natural premature menopause      |         |
|-----------------------------|----------------------------------|---------|----------------------------------|---------|
|                             | Sub-distribution hazard (95% CI) | P-value | Sub-distribution hazard (95% CI) | P-value |
| Hypertension*               | 2.09 (1.46-2.98)                 | <0.001  | 1.42 (1.22-1.65)                 | <0.001  |
| Hyperlipidemia**            | 2.19 (1.49-3.23)                 | <0.001  | 1.30 (1.09-1.55)                 | 0.004   |
| Type 2 diabetes mellitus*** | 2.14 (1.43-3.22)                 | <0.001  | 1.43 (1.19-1.74)                 | <0.001  |

Hazard ratios (HRs), 95% confidence intervals (CIs), and P-values are derived from competing risk regression models.

\*Model adjusted for age at study enrollment, race, body-mass index, prevalent hyperlipidemia, and prevalent type 2 diabetes mellitus

\*\*Model adjusted for age at study enrollment, race, body-mass index, prevalent hypertension, and prevalent type 2 diabetes mellitus

\*\*\*Model adjusted for age at study enrollment, race, body-mass index, prevalent hypertension, and prevalent hyperlipidemia

**eTable 17.** Sensitivity Analysis: Incident Development of Cardiovascular Risk Factors, Excluding 5,756 Women With Any Incident Cardiovascular Disease Diagnosis (n = 138,504).

|                             | Premature surgical menopause |         | Premature natural menopause |         |
|-----------------------------|------------------------------|---------|-----------------------------|---------|
|                             | HR (95% CI)                  | P-value | HR (95% CI)                 | P-value |
| Hypertension*               | 2.09 (1.46-3.00)             | <0.001  | 1.45 (1.24-1.69)            | <0.001  |
| Hyperlipidemia**            | 1.93 (1.25-2.96)             | 0.003   | 1.35 (1.12-1.62)            | 0.002   |
| Type 2 diabetes mellitus*** | 2.34 (1.55-3.55)             | <0.001  | 1.54 (1.27-1.87)            | <0.001  |

Hazard ratios (HRs), 95% confidence intervals (CIs), and P-values are derived from Cox proportional hazard models.

\*Model adjusted for age at study enrollment, race, body-mass index, prevalent hyperlipidemia, and prevalent type 2 diabetes mellitus

\*\*Model adjusted for age at study enrollment, race, body-mass index, prevalent hypertension, and prevalent type 2 diabetes mellitus

\*\*\*Model adjusted for age at study enrollment, race, body-mass index, prevalent hypertension, and prevalent hyperlipidemia

**eTable 18.** Hazards of Incident Hypertension, Hyperlipidemia, and Type 2 Diabetes by Age at Menopause Compared With Women With Menopause  $\geq$  Age 50.

| Age at menopause (years)           | Surgical menopause |         | Natural menopause |         |
|------------------------------------|--------------------|---------|-------------------|---------|
|                                    | HR (95% CI)        | P-value | HR (95% CI)       | P-value |
| <b>Hypertension*</b>               |                    |         |                   |         |
|                                    | P(trend) = 0.01    |         | P(trend) < 0.001  |         |
| <30                                | 3.1 (1.4-6.9)      | 0.007   | 1.4 (0.8-2.4)     | 0.23    |
| <35                                | 2.6 (1.6-4.2)      | <0.001  | 1.9 (1.5-2.4)     | <0.001  |
| <40                                | 2.0 (1.4-2.9)      | <0.001  | 1.4 (1.2-1.7)     | <0.001  |
| <45                                | 1.7 (1.4-2.1)      | <0.001  | 1.3 (1.2-1.4)     | <0.001  |
| <50                                | 1.5 (1.2-1.7)      | <0.001  | 1.2 (1.1-1.2)     | <0.001  |
| <b>Hyperlipidemia**</b>            |                    |         |                   |         |
|                                    | P(trend) = 0.003   |         | P(trend) < 0.001  |         |
| <30                                | 2.6 (1.1-6.2)      | 0.04    | 1.7 (1.0-2.9)     | 0.06    |
| <35                                | 2.3 (1.3-4.2)      | 0.003   | 1.8 (1.3-2.4)     | <0.001  |
| <40                                | 2.3 (1.6-3.4)      | <0.001  | 1.4 (1.1-1.7)     | <0.001  |
| <45                                | 1.6 (1.3-2.1)      | <0.001  | 1.3 (1.2-1.4)     | <0.001  |
| <50                                | 1.4 (1.2-1.7)      | <0.001  | 1.2 (1.1-1.3)     | <0.001  |
| <b>Type 2 diabetes mellitus***</b> |                    |         |                   |         |
|                                    | P(trend) = 0.24    |         | P(trend) < 0.001  |         |
| <30                                | 1.5 (0.4-6.1)      | 0.59    | 1.7 (0.9-3.0)     | 0.08    |
| <35                                | 2.0 (1.1-3.9)      | 0.03    | 1.7 (1.2-2.3)     | 0.001   |
| <40                                | 2.3 (1.5-3.4)      | <0.001  | 1.5 (1.3-1.9)     | <0.001  |
| <45                                | 2.1 (1.6-2.6)      | <0.001  | 1.3 (1.1-1.4)     | <0.001  |
| <50                                | 1.8 (1.5-2.2)      | <0.001  | 1.2 (1.1-1.3)     | <0.001  |

Hazard ratios (HRs), 95% confidence intervals (CIs), and P-values are derived from Cox proportional hazard models.

Groups are inclusive of all women with menopausal age below the listed cutoff.

\*Model adjusted for age at study enrollment, race, body-mass index, prevalent hyperlipidemia, and prevalent type 2 diabetes mellitus

\*\*Model adjusted for age at study enrollment, race, body-mass index, prevalent hypertension, and prevalent type 2 diabetes mellitus

\*\*\*Model adjusted for age at study enrollment, race, body-mass index, prevalent hypertension, and prevalent hyperlipidemia

**eAppendix.** ICD Codes Used to Identify Women With Congenital Heart Disease and to Ascertain Diagnoses of Cardiovascular Risk Factors and Cardiovascular Diseases.

| <b>Diagnosis</b>                     | <b>ICD codes</b>                                                                                                                                                                                                                                                                                                                                                                                                                                                                                                                                                                                                                                                                                |
|--------------------------------------|-------------------------------------------------------------------------------------------------------------------------------------------------------------------------------------------------------------------------------------------------------------------------------------------------------------------------------------------------------------------------------------------------------------------------------------------------------------------------------------------------------------------------------------------------------------------------------------------------------------------------------------------------------------------------------------------------|
| Congenital heart disease (exclusion) | ICD 9: 745, 7455, 746, 7464, 7468, 74687, 7469, 74693, 74699<br>ICD 10: K04, K04.1, K04.2, K04.4, K07, K07.8, K07.9, K09, K09.1, K09.2, K09.3, K09.5, K09.9, K10, K10.1, K10.2, K10.3, K10.4, K10.5, K10.8, K10.9, K11, K11.1, K11.2, K11.4, K11.5, K11.9, K12, K12.1, K12.2, K12.4, K12.8, K13, K13.1, K13.2, K13.3, K13.4, K.16.3, K16.5, K18, K18.3, K18.4, K18.8, K19, K19.1, K19.3, K20, K20.1, K20.2, Q20, Q20.1, Q20.2, Q20.3, Q20.4, Q20.5, Q20.6, Q20.8, Q20.9, Q21, Q21.0, Q21.1, Q21.2, Q21.3, Q21.4, Q21.8, Q21.9, Q22, Q22.1, Q22.2, Q22.4, Q22.5, Q22.8, Q22.9, Q23, Q23.0, Q23.1, Q23.2, Q23.3, Q23.4, Q23.8, Q23.9, Q24, Q24.0, Q24.3, Q24.4, Q24.5, Q24.6, Q24.8, Q24.9, Q22.5 |
| Hypertension                         | ICD 9: 401, 4010, 4011, 4019, 402, 4020, 4021, 4029, 403, 4031, 4039, 404, 4040, 4041, 4049, 405, 4050, 4051, 4059<br>ICD 10: I10, I11, I11.0, I11.9, I12, I12.0, I12.9, I13, I13.0, I13.1, I13.2, I13.9, I15, I15.0, I15.1, I15.2, I15.8, I15.9                                                                                                                                                                                                                                                                                                                                                                                                                                                |
| Hyperlipidemia                       | ICD 10: E78.0, E78.1, E78.2, E78.4, E78.5                                                                                                                                                                                                                                                                                                                                                                                                                                                                                                                                                                                                                                                       |
| Type 2 diabetes mellitus             | ICD 9: 2500, 25000, 25001, 25009, 25011, 25019, 2503, 2504, 2505, 25099<br>ICD 10: E10, E10.1, E10.2, E10.3, E10.4, E10.5, E10.6, E10.7, E10.8, E10.9, E11, E11.0, E11.1, E11.2, E11.3, E11.4, E11.5, E11.6, E11.7, E11.8, E11.9, E12, E12.1, E12.8, E12.9, E13, E13.1, E13.2, E13.3, E13.5, E13.6, E13.7, E13.8, E13.9, E14, E14.1, E14.2, E14.3, E14.4, E14.5, E14.6, E14.7, E14.8, E14.9                                                                                                                                                                                                                                                                                                     |
| Coronary artery disease              | ICD 9: 410, 4109, 411, 4119, 412, 4129, 4140, 4148, 4149<br>ICD 10: I21, I21.0, I21.1, I21.2, I21.3, I21.4, I21.9, I22, I22.0, I22.1, I22.8, I22.9, I23, I23.0, I23.1, I23.2, I23.3, I23.4, I23.5, I23.6, I23.8, I24, I24.0, I24.1, I24.8, I24.9, I25.1, I25.2, I25.5, I25.6, I25.8, I25.9                                                                                                                                                                                                                                                                                                                                                                                                      |
| Heart failure                        | ICD 9: 4254, 4280, 4281, 4289<br>ICD 10: I11.0, I11.3, I13.2, I25.5, I42.0, I42.1, I42.2, I42.5, I42.8, I42.9, I50, I50.1, I50.9                                                                                                                                                                                                                                                                                                                                                                                                                                                                                                                                                                |
| Aortic stenosis                      | ICD 10: I06.0, I06.2, I35.0, I35.2                                                                                                                                                                                                                                                                                                                                                                                                                                                                                                                                                                                                                                                              |



| <b>Diagnosis</b>                                                                   | <b>ICD codes</b>                                                                                                                                                                |
|------------------------------------------------------------------------------------|---------------------------------------------------------------------------------------------------------------------------------------------------------------------------------|
| Mitral regurgitation                                                               | ICD 9: 3942<br>ICD 10: I05.1, I05.2, I34.0                                                                                                                                      |
| Atrial fibrillation or flutter                                                     | ICD 9: 4273,<br>ICD 10: I48.0, I48.1, I48.2, I48.3, I48.4, I48.9                                                                                                                |
| Ischemic stroke [adjudicated centrally by UK Biobank staff using listed ICD codes] | ICD 9: 434, 43401, 43411, 43491, 436<br>ICD 10: I63.0, I63.1, I63.2, I63.3, I63.4, I63.5, I63.6, I63.8, I63.9, I64                                                              |
| Peripheral arterial disease                                                        | ICD 9: 4400, 4402, 4438, 4439<br>ICD 10: I70.0, I70.00, I70.01, I70.2, I70.20, I70.21, I70.8, I70.80, I70.9, I70.90, I73.8, I73.9                                               |
| Venous thromboembolism                                                             | ICD 9: 4151, 4511<br>ICD 10: I26, I26.0, I26.9, I80.0, I80.1, I80.2, I80.3, I80.8, I80.9, I81, I82.0, I82.2, D68, D68.0, D68.1, D68.2, D68.3, D68.4, D68.5, D68.6, D68.8, D68.9 |
